# Supplementary figures and images for: A structurally characterised, naked sp3-hybridised carbanion in the zwitterionic imido complex [Ti(NBut){C(Me2pz)3}Cl(THF)] (HMe2pz = 3,5-dimethylpyrazole)
Source: Royal Society of Chemistry journal article supplement (doi:10.1039/b100315l), 2001-01-01

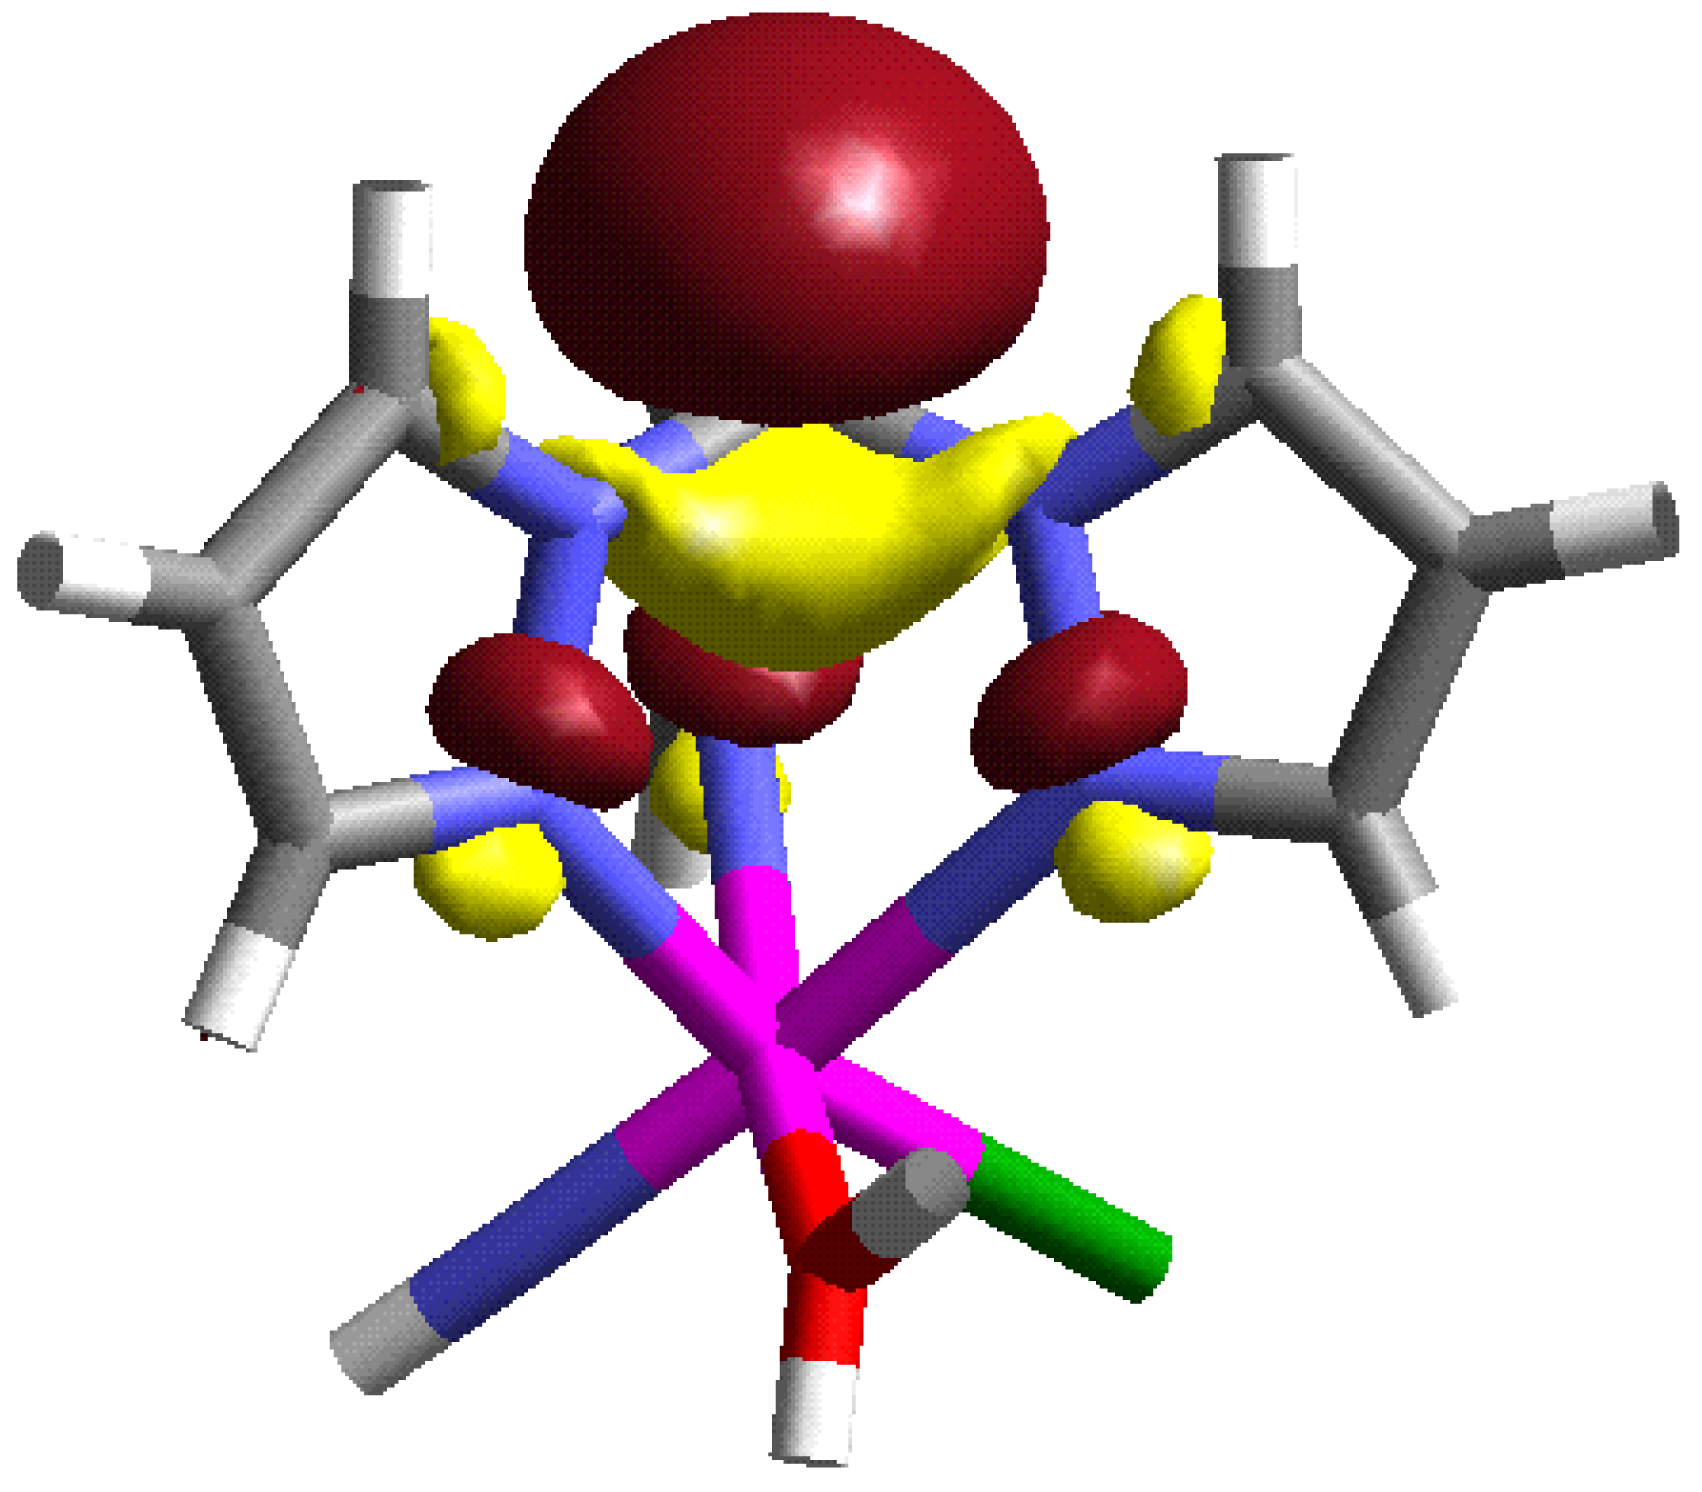


Isosurface for the HOMO of **2a**

Supplement: b100315l.doc [file b100315l.doc]
